# Supplementary material
Source: PubMed Central journal article supplement (PMC3634689)
Supplement: supp_tpc.112.108753_tpc108753Supplemental.pdf [file supp_tpc.112.108753_tpc108753Supplemental.pdf]

**Supplemental Figure 1.** Precision rates in the PLEV dataset, plotted against the confidence thresholds of the text mining data. A) Regulatory events. B) Binding events. A more stringent cut-off results in more accurate predictions in general (cf. regulatory events). However, a few high-ranking but wrong predictions can disturb the ranking severely for the most stringent cut-off values (artifact at the end of the curve for double-argument bindings).

**A**

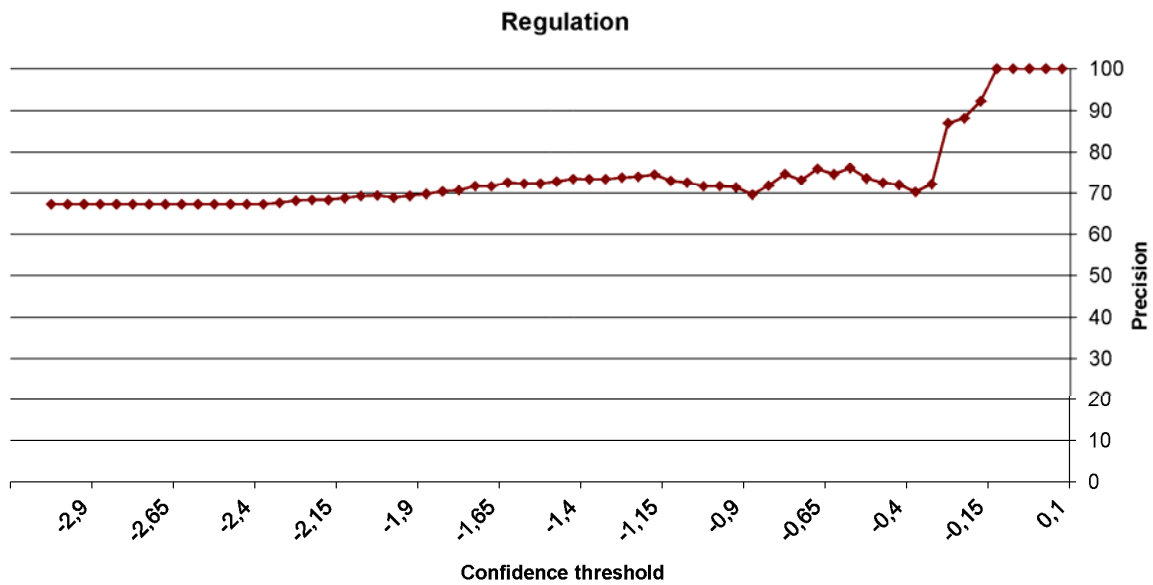

**B**

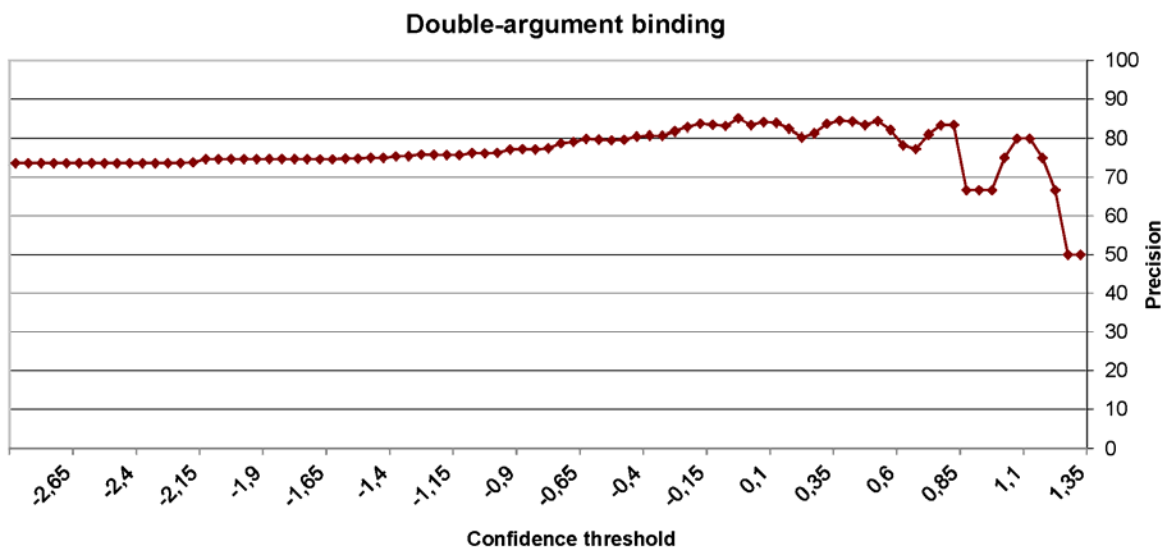

**Supplemental Table 1.** Overview of the mid- and large-scale PPI mapping studies.

| PubMed ID     | Number of PPIs | Type of proteins                  | REF  |
|---------------|----------------|-----------------------------------|------|
| PMID:17426018 | 205            | cell cycle                        | [1]  |
| PMID:19000166 | 215            | VH1/BRL2 receptor-like kinase     | [2]  |
| PMID:19130088 | 233            | calcium-dependent protein kinases | [3]  |
| PMID:17340043 | 241            | TFIID                             | [4]  |
| PMID:19452453 | 256            | 14-3-3 protein complexes          | [5]  |
| PMID:14749489 | 280            | Skp1-related genes                | [6]  |
| PMID:12795696 | 443            | SCF ubiquitin E3 ligase subunits  | [7]  |
| PMID:20407024 | 514            | cell cycle                        | [8]  |
| PMID:21189294 | 560            | nuclear pore complex              | [9]  |
| PMID:21952135 | 617            | G-protein interactome             | [10] |
| PMID:18642946 | 658            | two-component signalling complex  | [11] |
| PMID:15781858 | 722            | TALE homeodomain                  | [12] |
| PMID:15805477 | 989            | MADS-box genes                    | [13] |
| PMID:17360592 | 1607           | calmodulin-related proteins       | [14] |
| PMID:20706207 | 1778           | cell cycle                        | [15] |

1. Van Leene J, Stals H, Eeckhout D, Persiau G, Van De Slijke E, Van Isterdael G, De Clercq A, Bonnet E, Laukens K, Remmerie N *et al*: **A tandem affinity purification-based technology platform to study the cell cycle interactome in Arabidopsis thaliana**. *Mol Cell Proteomics* 2007, **6**(7):1226-1238.
2. Ceserani T, Trofka A, Gandotra N, Nelson T: **VH1/BRL2 receptor-like kinase interacts with vascular-specific adaptor proteins VIT and VIK to influence leaf venation**. *Plant J* 2009, **57**(6):1000-1014.
3. Uno Y, Rodriguez Milla MA, Maher E, Cushman JC: **Identification of proteins that interact with catalytically active calcium-dependent protein kinases from Arabidopsis**. *Mol Genet Genomics* 2009, **281**(4):375-390.
4. Lawit SJ, O'Grady K, Gurley WB, Czarnecka-Verner E: **Yeast two-hybrid map of Arabidopsis TFIID**. *Plant Mol Biol* 2007, **64**(1-2):73-87.
5. Chang IF, Curran A, Woolsey R, Quilici D, Cushman JC, Mittler R, Harmon A, Harper JF: **Proteomic profiling of tandem affinity purified 14-3-3 protein complexes in Arabidopsis thaliana**. *Proteomics* 2009, **9**(11):2967-2985.
6. Takahashi N, Kuroda H, Kuromori T, Hirayama T, Seki M, Shinozaki K, Shimada H, Matsui M: **Expression and interaction analysis of Arabidopsis Skp1-related genes**. *Plant Cell Physiol* 2004, **45**(1):83-91.
7. Risseuw EP, Daskalchuk TE, Banks TW, Liu E, Cotelesage J, Hellmann H, Estelle M, Somers DE, Crosby WL: **Protein interaction analysis of SCF ubiquitin E3 ligase subunits from Arabidopsis**. *Plant J* 2003, **34**(6):753-767.
8. Boruc J, Van den Daele H, Hollunder J, Rombauts S, Mylle E, Hilson P, Inze D, De Veylder L, Russinova E: **Functional modules in the Arabidopsis core cell cycle binary protein-protein interaction network**. *Plant Cell* 2010, **22**(4):1264-1280.
9. Tamura K, Fukao Y, Iwamoto M, Haraguchi T, Hara-Nishimura I: **Identification and characterization of nuclear pore complex components in Arabidopsis thaliana**. *Plant Cell* 2010, **22**(12):4084-4097.

10. Klopffleisch K, Phan N, Augustin K, Bayne RS, Booker KS, Botella JR, Carpita NC, Carr T, Chen JG, Cooke TR *et al*: **Arabidopsis G-protein interactome reveals connections to cell wall carbohydrates and morphogenesis.** *Mol Syst Biol* 2011, **7**:532.
11. Dortay H, Gruhn N, Pfeifer A, Schwerdtner M, Schmulling T, Heyl A: **Toward an interaction map of the two-component signaling pathway of Arabidopsis thaliana.** *J Proteome Res* 2008, **7**(9):3649-3660.
12. Hackbusch J, Richter K, Muller J, Salamini F, Uhrig JF: **A central role of Arabidopsis thaliana ovate family proteins in networking and subcellular localization of 3-aa loop extension homeodomain proteins.** *Proc Natl Acad Sci U S A* 2005, **102**(13):4908-4912.
13. de Folter S, Immink RG, Kieffer M, Parenicova L, Henz SR, Weigel D, Busscher M, Kooiker M, Colombo L, Kater MM *et al*: **Comprehensive interaction map of the Arabidopsis MADS Box transcription factors.** *Plant Cell* 2005, **17**(5):1424-1433.
14. Popescu SC, Popescu GV, Bachan S, Zhang Z, Seay M, Gerstein M, Snyder M, Dinesh-Kumar SP: **Differential binding of calmodulin-related proteins to their targets revealed through high-density Arabidopsis protein microarrays.** *Proc Natl Acad Sci U S A* 2007, **104**(11):4730-4735.
15. Van Leene J, Hollunder J, Eeckhout D, Persiau G, Van De Slijke E, Stals H, Van Isterdael G, Verkest A, Neiryneck S, Buffel Y *et al*: **Targeted interactomics reveals a complex core cell cycle machinery in Arabidopsis thaliana.** *Mol Syst Biol* 2010, **6**:397.

**Supplemental Table 2.** GO enrichment results for the network presented in Figure 3. (FDR: Bonferroni-corrected p-value)

| <b>GO ID</b> | <b>GO description</b>                                          | <b>Type</b> | <b>FDR</b> | <b>Enrichment</b> |
|--------------|----------------------------------------------------------------|-------------|------------|-------------------|
| GO:0009913   | epidermal cell differentiation                                 | BP          | 1.61E-23   | 46.702            |
| GO:0008544   | epidermis development                                          | BP          | 1.99E-23   | 46.168            |
| GO:0010026   | trichome differentiation                                       | BP          | 3.77E-19   | 79.933            |
| GO:0045165   | cell fate commitment                                           | BP          | 8.64E-18   | 117.558           |
| GO:0009888   | tissue development                                             | BP          | 5.33E-17   | 20.611            |
| GO:0030154   | cell differentiation                                           | BP          | 1.55E-16   | 19.422            |
| GO:0001071   | nucleic acid binding transcription factor activity             | MF          | 2.63E-14   | 6.655             |
| GO:0003700   | sequence-specific DNA binding transcription factor activity    | MF          | 2.63E-14   | 6.655             |
| GO:0048869   | cellular developmental process                                 | BP          | 4.94E-14   | 14.051            |
| GO:0031326   | regulation of cellular biosynthetic process                    | BP          | 2.55E-12   | 5.25              |
| GO:0009889   | regulation of biosynthetic process                             | BP          | 2.73E-12   | 5.236             |
| GO:0010468   | regulation of gene expression                                  | BP          | 6.87E-12   | 5.043             |
| GO:0048513   | organ development                                              | BP          | 1.11E-11   | 9.2               |
| GO:0048731   | system development                                             | BP          | 1.18E-11   | 9.17              |
| GO:2001141   | regulation of RNA biosynthetic process                         | BP          | 1.41E-11   | 5.281             |
| GO:0051252   | regulation of RNA metabolic process                            | BP          | 1.56E-11   | 5.258             |
| GO:0080090   | regulation of primary metabolic process                        | BP          | 1.57E-11   | 4.877             |
| GO:0003677   | DNA binding                                                    | MF          | 2.11E-11   | 5.423             |
| GO:0010556   | regulation of macromolecule biosynthetic process               | BP          | 2.27E-11   | 5.176             |
| GO:2000112   | regulation of cellular macromolecule biosynthetic process      | BP          | 2.27E-11   | 5.176             |
| GO:0019219   | regulation of nucleobase-containing compound metabolic process | BP          | 3.89E-11   | 5.059             |
| GO:0006351   | transcription, DNA-dependent                                   | BP          | 4.19E-11   | 5.043             |
| GO:0051171   | regulation of nitrogen compound metabolic process              | BP          | 4.71E-11   | 5.019             |
| GO:0032774   | RNA biosynthetic process                                       | BP          | 4.86E-11   | 5.012             |
| GO:0001708   | cell fate specification                                        | BP          | 1.66E-10   | 120.846           |
| GO:0048856   | anatomical structure development                               | BP          | 2.01E-07   | 4.903             |
| GO:0009813   | flavonoid biosynthetic process                                 | BP          | 4.65E-07   | 41.893            |
| GO:0009962   | regulation of flavonoid biosynthetic process                   | BP          | 1.12E-06   | 112.214           |
| GO:0009812   | flavonoid metabolic process                                    | BP          | 1.46E-06   | 35.705            |
| GO:0010090   | trichome morphogenesis                                         | BP          | 3.79E-06   | 48.966            |
| GO:0007275   | multicellular organismal development                           | BP          | 4.00E-06   | 4.154             |
| GO:0048468   | cell development                                               | BP          | 5.43E-06   | 16.031            |
| GO:1900376   | regulation of secondary metabolite biosynthetic process        | BP          | 5.76E-06   | 83.122            |
| GO:0032501   | multicellular organismal process                               | BP          | 9.08E-06   | 3.967             |
| GO:2000762   | regulation of phenylpropanoid metabolic process                | BP          | 1.01E-05   | 74.81             |
| GO:0009653   | anatomical structure morphogenesis                             | BP          | 1.27E-05   | 8.377             |
| GO:0032502   | developmental process                                          | BP          | 1.79E-05   | 3.817             |

|            |                                                  |    |           |        |
|------------|--------------------------------------------------|----|-----------|--------|
| GO:0009699 | phenylpropanoid biosynthetic process             | BP | 7.03E-05  | 20.536 |
| GO:0010053 | root epidermal cell differentiation              | BP | 7.19E-05  | 30.26  |
| GO:0043455 | regulation of secondary metabolic process        | BP | 8.47E-05  | 49.873 |
| GO:0009718 | anthocyanin biosynthetic process                 | BP | 0.0003217 | 78.062 |
| GO:0009698 | phenylpropanoid metabolic process                | BP | 0.0003971 | 15.949 |
| GO:0044550 | secondary metabolite biosynthetic process        | BP | 0.0004253 | 15.789 |
| GO:0010054 | trichoblast differentiation                      | BP | 0.0015763 | 28.054 |
| GO:0000904 | cell morphogenesis involved in differentiation   | BP | 0.0022587 | 16.938 |
| GO:0010015 | root morphogenesis                               | BP | 0.0022587 | 16.938 |
| GO:0046283 | anthocyanin metabolic process                    | BP | 0.002347  | 48.525 |
| GO:0009753 | response to jasmonic acid stimulus               | BP | 0.003949  | 15.389 |
| GO:0019438 | aromatic compound biosynthetic process           | BP | 0.0042171 | 11.221 |
| GO:0007267 | cell-cell signaling                              | BP | 0.006239  | 38.201 |
| GO:0019748 | secondary metabolic process                      | BP | 0.010822  | 9.728  |
| GO:0022603 | regulation of anatomical structure morphogenesis | BP | 0.0136005 | 31.499 |
| GO:0031537 | regulation of anthocyanin metabolic process      | BP | 0.0173762 | 70.872 |
| GO:0010091 | trichome branching                               | BP | 0.0408675 | 53.863 |

---

**Supplemental Table 3.** Illustrative examples of event extraction from text, randomly chosen from the interactions depicted in Figure 3. Each event can have multiple arguments of a specific type, such as T(heme) and C(ause), expressing the subject and the object of the interaction, respectively.

|   | PMID/PMC       | Extracted data                                                                                                                                                                                                                                                                                          | Confidence       | Manual evaluation                                          |
|---|----------------|---------------------------------------------------------------------------------------------------------------------------------------------------------------------------------------------------------------------------------------------------------------------------------------------------------|------------------|------------------------------------------------------------|
| 1 | PM 18434419    | Binding(T: GL1, T: ttg2)                                                                                                                                                                                                                                                                                | Very high        | Correct                                                    |
|   |                | <i>In vivo binding of the R2R3-MYB protein GLABRA1 (GL1) to the promoters of GLABRA2 (GL2), TRANSPARENT TESTA GLABRA2 (TTG2), CAPRICE (CPC) and ENHANCER OF TRIPTYCHON AND CAPRICE1 (ETC1) establishes that these genes are major transcriptional targets for the TTG1-bHLH-MYB regulatory complex.</i> |                  |                                                            |
| 2 | PM 18434419    | Negative_regulation(T: TTG1)<br>+ Regulation(T: GL3)                                                                                                                                                                                                                                                    | Average<br>+ Low | Correct individual events –<br>complex event not extracted |
|   |                | <i>The loss of TTG1 and GL1 through mutation, affects the subcellular distribution of GL3.</i>                                                                                                                                                                                                          |                  |                                                            |
| 3 | PMC<br>2492867 | Positive_regulation(C: GL3, T:<br>Gene_expression(T: GL2))                                                                                                                                                                                                                                              | Very high        | Correct                                                    |
|   |                | <i>Based on the results of yeast-two-hybrid interaction assays, it has been proposed that TTG1, GL1 or WER, and GL3 or EGL3 form an activator complex to induce GL2 expression [16].</i>                                                                                                                |                  |                                                            |
| 4 | PMC<br>2929091 | Positive_regulation(C: SPL9, T:<br>Transcription(T: TRY))                                                                                                                                                                                                                                               | Very high        | Correct                                                    |
|   |                | <i>A significant increase of TRY and TCL1 transcript abundance was observed after 5 h (Figure 4A), suggesting that SPL9 rapidly activated the transcription of TRY and TCL1.</i>                                                                                                                        |                  |                                                            |
| 5 | PMC<br>2492867 | Positive_regulation(C: GL1,<br>T: TCL1)                                                                                                                                                                                                                                                                 | Very high        | Negation not extracted                                     |
|   |                | <i>By using Arabidopsis protoplast transfection assays, we found that all single-repeat R3 MYBs examined interact with GL3, and that GL1 or WER and GL3 or EGL3 are required and sufficient to activate the transcription of TRY, CPC, ETC1 and ETC3, but not TCL1 and ETC2.</i>                        |                  |                                                            |
| 6 | PM 15310821    | Binding(T: LHY, T: LKP2)<br><br>+ Negation                                                                                                                                                                                                                                                              | Very high        | Negation not extracted                                     |
|   |                | <i>The two-hybrid analysis also demonstrated that LKP2 interacted with TOC1, a clock component, but not with CCA1 or LHY, negative regulators of TOC1 gene expression.</i>                                                                                                                              |                  |                                                            |
| 7 | PM 16500988    | Positive_regulation(C: PIF4, T:<br>Regulation(T: SHB1))<br><br>+ Speculation                                                                                                                                                                                                                            | Average          | Correct – speculation<br>extracted                         |
|   |                | <i>PIF4 appears to specifically mediate SHB1 regulation of hypocotyl elongation and CHLOROPHYLL a/b BINDING PROTEIN3 or CHALCONE SYNTHASE expression under red light.</i>                                                                                                                               |                  |                                                            |

**Supplemental Table 4.** An in-depth analysis of the low confidence text mining events appearing in Figure 6 (dashed edges).

| Event                                                                                                                                                                                                                                                                                                                                                            | PMID/PMC   | Confidence | Manual evaluation         |
|------------------------------------------------------------------------------------------------------------------------------------------------------------------------------------------------------------------------------------------------------------------------------------------------------------------------------------------------------------------|------------|------------|---------------------------|
| <b>1</b> AS2 regulates KAN1                                                                                                                                                                                                                                                                                                                                      | PM18849474 | -1.12306   | correct                   |
| <i>We also show that the abaxial expression of KAN1 is mediated directly or indirectly by AS2.</i>                                                                                                                                                                                                                                                               |            |            |                           |
| <b>2</b> KAN1 regulates AS2                                                                                                                                                                                                                                                                                                                                      | PM18849474 | -0.86297   | correct                   |
| <i>KANAD11 regulates adaxial-abaxial polarity in Arabidopsis by directly repressing the transcription of ASYMMETRIC LEAVES2.</i>                                                                                                                                                                                                                                 |            |            |                           |
| <b>3</b> AS1 regulates YAB5<br>AS2 regulates YAB5                                                                                                                                                                                                                                                                                                                | PMC2621207 | -1.03652   | speculation not extracted |
| <i>The expression of YAB5 was recently suggested to be negatively modulated in the adaxial domain by AS1 and AS2, two genes critical for the development of properly expanded leaves [68].</i>                                                                                                                                                                   |            |            |                           |
| <b>4</b> AS2 regulates KNAT2                                                                                                                                                                                                                                                                                                                                     | PMC2993911 | -1.01328   | correct                   |
| <i>AS2 is required to prevent expression of the class I KNOX homeobox genes BREVIPEDICELLUS (BP), KNAT2, and KNAT6 in the leaf (Ori et al., 2000; Semiarti et al., 2001; Lin et al., 2003).</i>                                                                                                                                                                  |            |            |                           |
| <b>5</b> AS1 – GTE6 binding                                                                                                                                                                                                                                                                                                                                      | PM16166385 | -1.43169   | correct                   |
| <i>Using chromatin immunoprecipitation (ChIP) assays, we show that GTE6 is associated with the promoter and the start of the transcribed region of AS1 and up-regulates expression of AS1 through acetylation of histones H3 and H4.<br/>The bromodomain protein GTE6 controls leaf development in Arabidopsis by histone acetylation at ASYMMETRIC LEAVES1.</i> |            |            |                           |
| <b>6</b> GTE6 regulates AS1                                                                                                                                                                                                                                                                                                                                      | PM16166385 | -1.06718   | correct                   |
| <i>GTE6 positively regulates the expression of ASYMMETRIC LEAVES1 (AS1), which encodes a myb-domain protein that controls proximodistal patterning of leaves.</i>                                                                                                                                                                                                |            |            |                           |
| <b>7</b> GTE6 regulates AS1                                                                                                                                                                                                                                                                                                                                      | PM16166385 | -1.33552   | correct                   |
| <i>Genetic studies demonstrated that AS1 is epistatic to GTE6, indicating that GTE6 regulates AS1 during leaf morphogenesis.<br/>GTE6 was shown to positively regulate the myb domain gene ASYMMETRIC LEAF1 (AS1), which is involved in leaf axis specification in mature leaves.</i>                                                                            |            |            |                           |
| <b>8</b> CUC1 – CUC3 binding                                                                                                                                                                                                                                                                                                                                     | PM12837947 | -1.08633   | not a binding event       |
| <i>This gene, CUP-SHAPED COTYLEDON3 (CUC3), encodes a putative NAC-domain transcription factor that is homologous with CUC1 and CUC2.</i>                                                                                                                                                                                                                        |            |            |                           |

**Supplemental Table 5.** Overview of the 26 candidate genes associated to core CC genes, based solely on text mining. When the claim was wrongly extracted from literature, the note “no valid text mining evidence” is displayed, and such findings should be regarded as false positive predictions.

|    | <b>Gene</b> | <b>Gene symbols</b> | <b>Connected to core CC gene</b> | <b>Literature evidence</b>                                                                                                                                                                                                                  |
|----|-------------|---------------------|----------------------------------|---------------------------------------------------------------------------------------------------------------------------------------------------------------------------------------------------------------------------------------------|
| 1  | AT4G32551   | RON2, LEUNIG        | HEN3<br>CDKE;1                   | The transcription corepressor <b>LEUNIG</b> interacts with the histone deacetylase HDA19 and mediator components MED14 (SWP) and CDK8 ( <b>HEN3</b> ) to repress transcription                                                              |
| 2  | AT1G24590   | SOB2                | CYCD1;1                          | <b>ESR2</b> directly targeted <b>CYCLIN D1;1</b>                                                                                                                                                                                            |
| 3  | AT4G02980   | ABP1                | CYCD3;1<br>(undirect)            | Therefore, both overexpression of <b>CYCD3.1</b> and reduction of RBR bypass the cell cycle arrest mediated by inactivation of <b>ABP1</b> in root cap stem cells, suggesting that the CYCLIN D/RBR pathway is operating downstream of ABP1 |
| 4a | AT4G37650   | SHR                 | CYCD6;1                          | <b>SHR</b> has been demonstrated to directly regulate the expression of genes including (...) the D-type cyclin, <b>CYCD6;1</b>                                                                                                             |
| 4b | AT4G37650   | SHR                 | RBR1                             | (...) SCARECROW and <b>SHR</b> (...) also regulate the transcription of a set of cell cycle regulatory proteins, including <b>RETINOBLASTOMA RELATED</b> (...).                                                                             |
| 5  | AT2G35670   | FIS2                | RBR1                             | We thus concluded that <b>RBR1</b> is necessary for <b>FIS2</b> expression in the central cell.                                                                                                                                             |
| 6  | AT4G25530   | HDG6, FWA           | RBR1                             | Hence, both MSI1 and <b>RBR1</b> are required for <b>FWA</b> and FIS2 expression.                                                                                                                                                           |
| 7  | AT2G19520   | FVE, NFC4           | RBR1<br><br>(unspecific)         | It is noteworthy that <b>FVE</b> can directly interact with a <b>plant retinoblastoma protein</b>                                                                                                                                           |
| 8  | AT4G29910   | ORC5                | NOT to RBR1<br><br>(negation)    | Therefore, all these data together led us to conclude that expression of all AtORC genes, <b>except AtORC5</b> , is regulated by the <b>RBR/E2F</b> pathway                                                                                 |
| 9  | AT1G02580   | SDG5, MEA           | NOT to RBR1<br><br>(negation)    | We thus concluded that <b>MEA</b> expression in the central cell is <b>not</b> regulated by MSI1 and <b>RBR1</b>                                                                                                                            |
| 10 | AT2G26430   | RCY1                | -                                | no valid text mining evidence                                                                                                                                                                                                               |



|    |           |            |   |                               |
|----|-----------|------------|---|-------------------------------|
| 11 | AT4G39400 | DWF2       | - | no valid text mining evidence |
| 12 | AT2G33880 | WOX9A      | - | no valid text mining evidence |
| 13 | AT3G59420 | CR4        | - | no valid text mining evidence |
| 14 | AT3G19590 | BUB3.1     | - | no valid text mining evidence |
| 15 | AT3G15970 | NUP50      | - | no valid text mining evidence |
| 16 | AT4G14110 | FUS7, COP9 | - | no valid text mining evidence |
| 17 | AT5G51600 | PLE        | - | no valid text mining evidence |
| 18 | AT2G46410 | CPC        | - | no valid text mining evidence |
| 19 | AT5G04340 | ZAT6       | - | no valid text mining evidence |
| 20 | AT1G24290 |            | - | no valid text mining evidence |
| 21 | AT5G20730 | TIR5, ARF7 | - | no valid text mining evidence |
| 22 | AT1G75950 | UIP1, ASK1 | - | no valid text mining evidence |
| 23 | AT4G23713 | MIR319A    | - | no valid text mining evidence |
| 24 | AT5G10380 | RING1      | - | no valid text mining evidence |
| 25 | AT1G72930 | TIR        | - | no valid text mining evidence |
| 26 | AT2G47980 | SCC3       | - | no valid text mining evidence |
